# Supplementary material for: Coronavirus Disease 2019 (COVID-19)-Associated Hospitalization and Mortality in Patients with Psoriasis: A Population-Based Study
Source: Springer Nature journal article supplement (doi:10.1007/s40257-021-00605-8), 2021-05-31
Supplement: MOESM1 [file 19213030]

**Coronavirus disease 2019 (COVID-19)-associated hospitalization and mortality in patients  
with psoriasis - A population-based study**

Khalaf Kridin MD, PhD<sup>1,2</sup>; Yochai Schonmann MD, MSc<sup>3</sup>; Dana Tzur Bitan PhD<sup>4</sup>;

Giovanni Damiani M.D.<sup>5</sup>; Alon Peretz MD, MOccH<sup>3</sup>, MHA ;Orly Weinstein MD, MPH<sup>3,6\*</sup>;

Arnon D. Cohen MD, PhD<sup>3,6\*</sup>

**American Journal of Clinical Dermatology, 2021**

**Supplementary Table 1:** Comorbidities of the study population of patients with psoriasis and COVID-19.

| <b>Characteristic</b>       | <b>Patients with psoriasis and COVID-19<br/>(N=3,151)</b> |
|-----------------------------|-----------------------------------------------------------|
| <b>Comorbidities, n (%)</b> |                                                           |
| Ischemic heart disease      | 271 (8.6%)                                                |
| Congestive heart failure    | 80 (2.5%)                                                 |
| Cerebrovascular disease     | 126 (4.0%)                                                |
| Dyslipidemia                | 1,214 (38.5%)                                             |
| Hypertension                | 705 (22.4%)                                               |
| Diabetes mellitus           | 552 (17.5%)                                               |
| Obesity                     | 1,037 (32.9%)                                             |
| COPD                        | 109 (3.5%)                                                |
| Asthma                      | 288 (9.1%)                                                |
| Smoking                     | 955 (30.3%)                                               |
| Cirrhosis                   | 8 (0.3%)                                                  |
| Chronic renal failure       | 116 (3.7%)                                                |
| Malignancy                  | 228 (7.2%)                                                |
| Depression                  | 223 (7.1%)                                                |
| A history of Tuberculosis   | 9 (0.3%)                                                  |

**Abbreviations:** n, number; COPD, chronic obstructive pulmonary disease;
